# Supplementary material
Source: Research Square preprint supplement (doi:10.21203/rs.3.rs-10267137/v1)
Supplement: Supplementary file 1 [file 829c54bc42e4cf9b5df9d0f5.docx]

**Tables**

Table 1 Quantitative real-time PCR primers for 16S rRNA genes

| Strain | Primer 5′-3′ | Reference |
| --- | --- | --- |
| 7YR-11 | F: CGCAGAACCTTACCAGCGTTT | (Murakami et al. 2010) |
|  | R: GCTGCCCACTGTCACCGCCATT |  |
| 7YT-32 | F: CTCGGGTGACGAGCGG | (Tai et al. 2022) |
|  | R: TGAGCCGTTACCCCACCTAC |  |
| 7YR-10 | F: TCAACTCTTTGGACACTCGTAAACA | (Ren et al. 2014) |
|  | R: CATGCCGTGAAGCCCAAGAC |  |
| 7YT-D | F: GGTCTGAGAGGATGATCAGT | (Widmer et al. 1998) |
|  | R: TTAGCTCCACCTCGCGGC |  |
| L5-4 | F: CCCGCATCTCTGCAGGATTCTC | (Mashoufi et al. 2019) |
|  | R: CTAATACCGCATAACGTCTACG |  |
