# Supplementary material
Source: Research Square preprint supplement (doi:10.21203/rs.3.rs-10267137/v1)
Supplement: Supplementary file 2 [file 83fdbdac184b5eeb56b66739.docx]

**Supplementary Materials**

Supplementary Table 1 Taxonomic classification of culturable endophytic bacteria isolated from rice cultivar 728B

| Top-hit taxon | Top-hit isolate | Similarity (%) | No. of isolates | Resource |
| --- | --- | --- | --- | --- |
| *Agrobacterium larrymoorei* | ATCC 51759(T) | 99.85 | 3 | Root |
| *Agrobacterium pusense* | LMG 25623(T) | 100 | 7 | Root |
| *Agrobacterium pusense* | LMG 25623(T) | 99.92 | 1 | Culture medium |
| *Bacillus cereus* | ATCC 14579(T) | 99.44 | 2 | Root |
| *Bacillus cereus* | ATCC 14579(T) | 100 | 1 | Culture medium |
| *Cohnella rhizosphaerae* | CSE-5610(T) | 99.71 | 1 | Culture medium |
| *Cronobacter malonaticus* | LMG 23826(T) | 99.93 | 1 | Root |
| *Cronobacter malonaticus* | LMG 23826(T) | 99.93 | 2 | Culture medium |
| *Curtobacterium luteum* | DSM 20542(T) | 99.85 | 2 | Root |
| *Enterobacter mori* | LMG 25706(T) | 99.44 | 1 | Culture medium |
| *Enterobacter quasiroggenkampii* | WCHECl-1060(T) | 99.15 | 1 | Culture medium |
| *Klebsiella pneumoniae* | ATCC 13884(T) | 99.29 | 8 | Root |
| *Klebsiella pneumoniae* | ATCC 13884(T) | 99.79 | 1 | Culture medium |
| *Microbacterium algeriense* | G1(T) | 99.84 | 2 | Root |
| *Microbacterium paraoxydans* | NBRC 103076(T) | 99.56 | 1 | Root |
| *Microbacterium testaceum* | NBRC 12675(T) | 99.11 | 2 | Root |
| *Microbacterium testaceum* | NBRC 12675(T) | 99.07 | 3 | Culture medium |
| *Neobacillus drentensis* | LMG 21831(T) | 99.49 | 1 | Root |
| *Paenibacillus silvae* | DB13031(T) | 100 | 1 | Root |
| *Pantoea dispersa* | LMG 2603(T) | 100 | 3 | Root |
| *Pseudacidovorax intermedius* | DSM 21352(T) | 99.85 | 1 | Culture medium |
| *Pseudomonas aeruginosa* | JCM 5962(T) | 99.86 | 1 | Culture medium |
| *Pseudomonas oryzihabitans* | NBRC 102199(T) | 100 | 4 | Culture medium |
| *Sphingobium yanoikuyae* | ATCC 51230(T) | 99.69 | 1 | Root |
| *Sphingomonas aquatilis* | JSS7(T) | 99.78 | 1 | Culture medium |
| *Stenotrophomonas maltophilia* | MTCC 434(T) | 99.64 | 1 | Culture medium |

Supplementary Table 2 Taxonomic classification of culturable endophytic bacteria isolated from rice cultivar BB

| Top-hit taxon | Top-hit isolate | Similarity (%) | No. of isolates | Resource |
| --- | --- | --- | --- | --- |
| *Aeromonas caviae* | CECT 838(T) | 99.93 | 1 | Culture medium |
| *Agrobacterium cavarae* | RZME10(T) | 99.92 | 2 | Root |
| *Agrobacterium larrymoorei* | ATCC 51759(T) | 99.7 | 1 | Root |
| *Agrobacterium pusense* | LMG 25623(T) | 99.92 | 4 | Root |
| *Agrobacterium pusense* | LMG 25623(T) | 99.92 | 1 | Culture medium |
| *Bacillus cereus* | ATCC 14579(T) | 100 | 2 | Root |
| *Bacillus zanthoxyli* | 1433(T) | 99.58 | 1 | Culture medium |
| *Chryseobacterium camelliae* | THG C4-1(T) | 100 | 1 | Culture medium |
| *Cronobacter malonaticus* | LMG 23826(T) | 99.56 | 1 | Root |
| *Cronobacter malonaticus* | LMG 23826(T) | 99.93 | 2 | Culture medium |
| *Cronobacter sakazakii* | NBRC 102416(T) | 99.5 | 1 | Root |
| *Cronobacter sakazakii* | NBRC 102416(T) | 97.76 | 1 | Culture medium |
| *Enterobacter hormaechei* | LMG 27195(T) | 99.51 | 2 | Root |
| *Enterobacter quasiroggenkampii* | WCHECl-1060(T) | 99.89 | 1 | Culture medium |
| *Herbaspirillum seropedicae* | Z67(T) | 99.57 | 1 | Culture medium |
| *Klebsiella pneumoniae* | ATCC 13884(T) | 99.64 | 3 | Root |
| *Klebsiella pneumoniae* | ATCC 13884(T) | 99.72 | 2 | Culture medium |
| *Microbacterium testaceum* | NBRC 12675(T) | 99.11 | 5 | Root |
| *Microbacterium testaceum* | NBRC 12675(T) | 99.18 | 2 | Culture medium |
| *Paenibacillus silvae* | DB13031(T) | 100 | 1 | Culture medium |
| *Pantoea dispersa* | LMG 2603(T) | 100 | 1 | Root |
| *Pantoea dispersa* | LMG 2603(T) | 100 | 1 | Culture medium |
| *Patulibacter americanus* | DSM 16676(T) | 98.15 | 2 | Root |
| *Priestia aryabhattai* | B8W22(T) | 99.65 | 1 | Culture medium |
| *Sphingomonas endophytica* | YIM 65583(T) | 99.92 | 2 | Root |
| *Sphingomonas sanguinis* | NBRC 13937(T) | 99.77 | 2 | Culture medium |
| *Sphingomonas sanguinis* | NBRC 13937(T) | 99.7 | 1 | Culture medium |
| *Xanthomonas sontii* | PPL1(T) | 99.85 | 1 | Root |
| *Xanthomonas sontii* | PPL1(T) | 99.86 | 2 | Culture medium |

Supplementary Table 3 Characterization of plant growth-promoting traits in endophytic Bacteria

| Strain | Top-hit Taxon | MIC  (μM) | IAA(μg/mL) | Siderophore  (mg/L) | Phosphate solubilization efficiency (mg/L) | ACC deaminase (U/mg) |
| --- | --- | --- | --- | --- | --- | --- |
| 7YT-32 | *Klebsiella pneumoniae* | 640 | 50.20±2.34 | 16.65±0.32 | 0.21±0.05 | 0.39±0.01 |
| 7YR-10 | *Microbacterium testaceum* | 80 | 1.73±0.11 | 5.58±0.92 | 0.08±0.04 | 7.45±0.76 |
| L5-4 | *Cronobacter malonaticus* | 640 | 0.22±0.22 | 20.32±0.46 | 5.15±0.05 | 2.33±0.12 |
| L5-8 | *Bacillus cereus* | 1280 | 0.43±0.02 | 7.35±0.70 | 4.98±0.05 | 0.46±0.09 |
| 728BT-5 | *Pantoea dispersa* | 320 | 1.52±0.05 | 17.33±0.90 | 0.10±0.07 | 0.39±0.04 |
| 728BR-4 | *Agrobacterium larrymoorei* | 40 | 4.12±0.09 | 19.35±0.68 | 0.09±0.05 | 1.39±0.06 |
| 728BT-9 | *Curtobacterium luteum* | 40 | 1.15±0.03 | / | 0.08±0.04 | 5.78±0.57 |
| 728BR-9 | *Microbacterium algeriense* | 80 | 4.29±0.37 | 19.08±0.24 | 0.17±0.04 | 2.04±0.08 |
| 7YR-2 | *Enterobacter quasiroggenkampii* | 80 | 25.53±0.26 | / | 0.19±0.04 | 0.35±0.03 |
| 7YR-12 | *Enterobacter mori* | 80 | 20.31±0.54 | 24.05±1.37 | 0.14±0.04 | 2.02±0.05 |
| L5-5 | *Pseudacidovorax intermedius* | 40 | 0.13±0.17 | 19.44±2.59 | 0.12±0.04 | 0.11±0.02 |
| 7YT-D | *Pseudomonas aeruginosa* | 640 | 4.53±0.37 | / | 5.03±0.05 | 11.36±0.84 |
| 7YR-11 | *Sphingomonas aquatilis* | 640 | 39.68±1.40 | 9.01±0.77 | 4.76±0.05 | 0.27±0.05 |
| 728BR-1 | *Neobacillus drentensis* | 80 | 1.42±0.15 | 17.85±0.20 | 4.99±0.04 | 1.11±0.15 |
| L0-5 | *Paenibacillus silvae* | 80 | 0.43±0.13 | 4.17±0.61 | 0.25±0.04 | 0.26±0.01 |
| 728BR-3 | *Sphingobium yanoikuyae* | 40 | 1.10±0.24 | / | 0.15±0.04 | 0.86±0.04 |


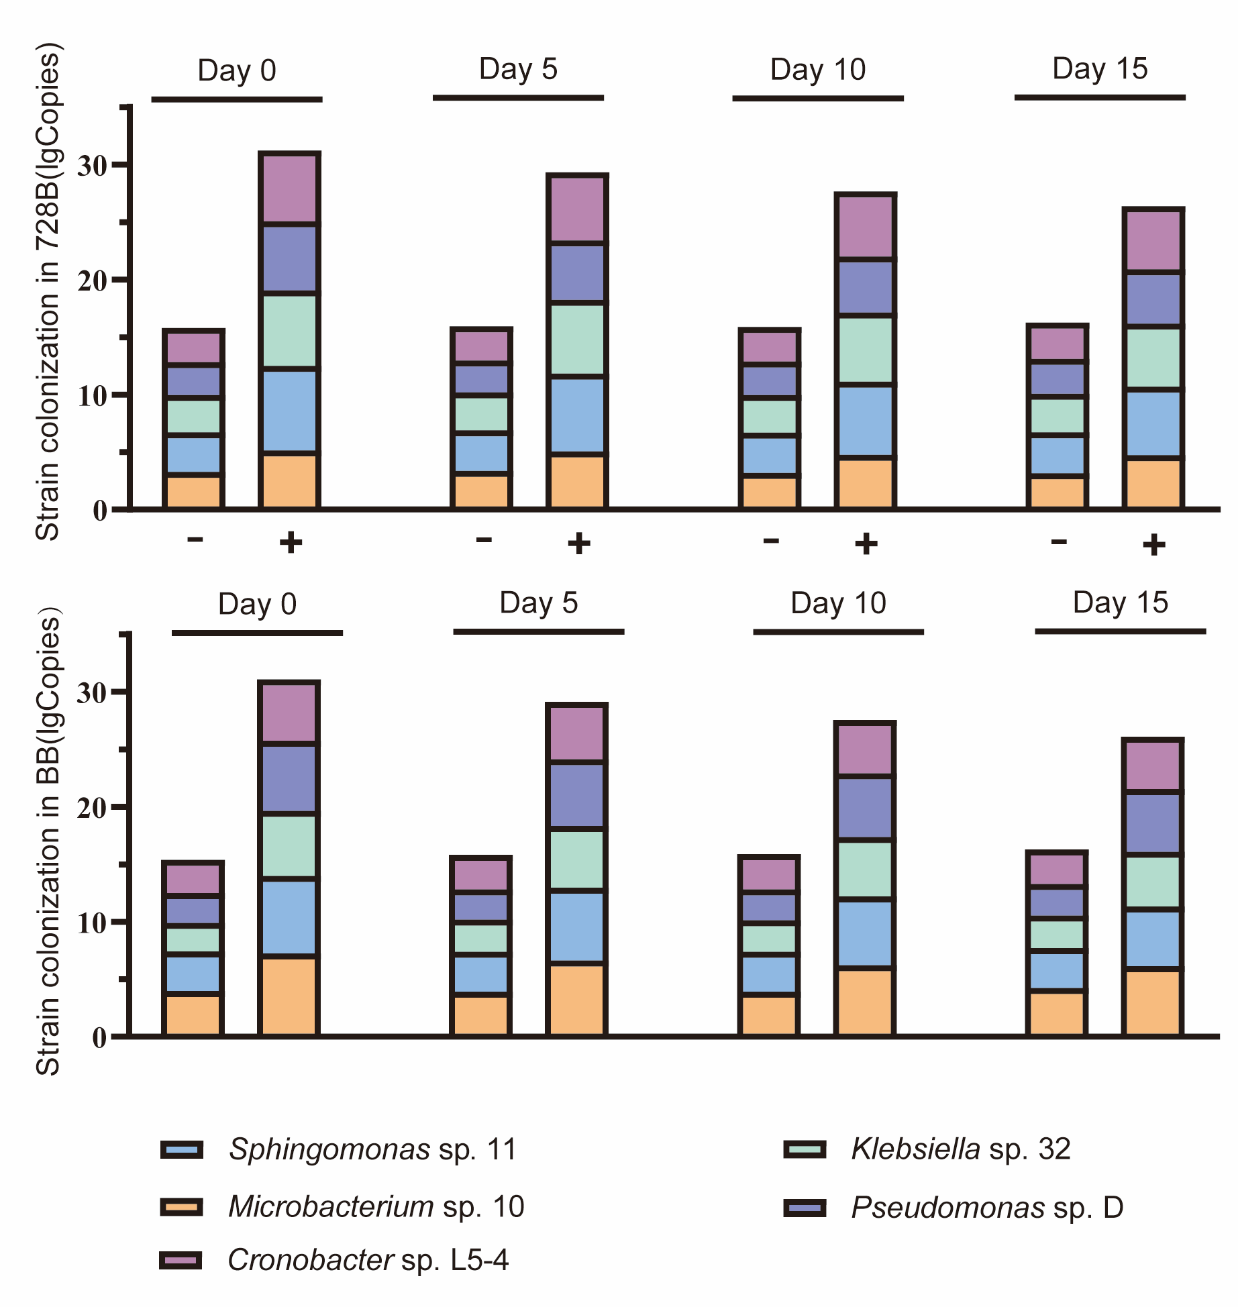


Supplementary Figure 1 Root colonization of rice cultivars 728B and BB by the SKMPC consortium. +/- : with or without SKMPC inoculation
